# Supplementary material for: A Marine Alkaloid, Ascomylactam A, Suppresses Lung Tumorigenesis via Inducing Cell Cycle G1/S Arrest through ROS/Akt/Rb Pathway
Source: MDPI journal article supplement (doi:10.3390/md18100494), 2020-09-27
Supplement: s1 [file s1]

## Supplementary Materials

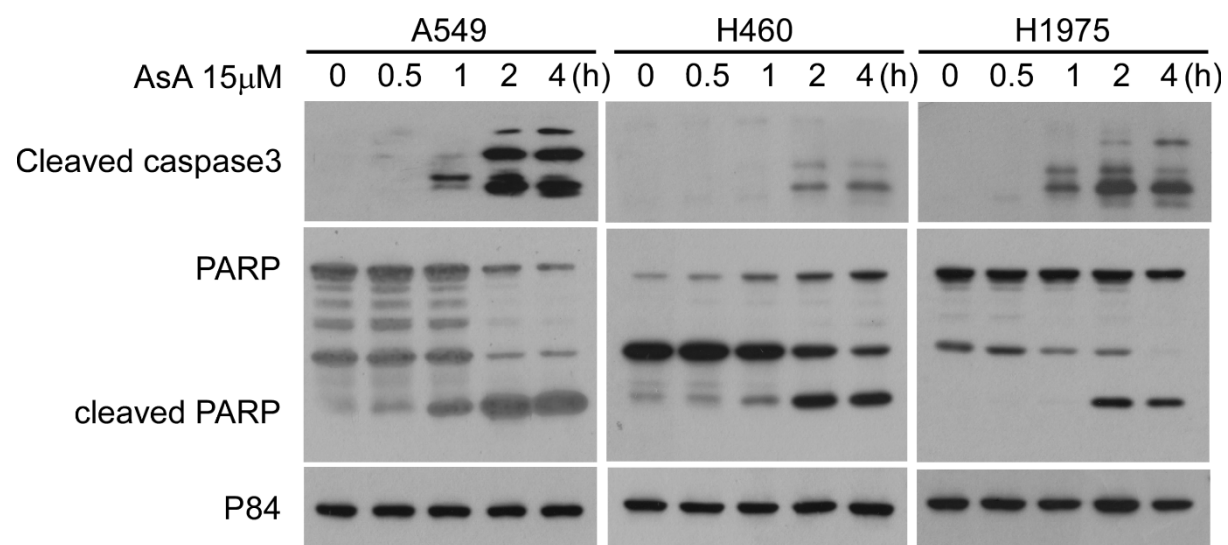

**Figure S1.** Effects of AsA on apoptotic markers in NSCLC cells. Western blotting analysis of caspases3 and PARP in A549, NCI-H460 and NCI-H1975 cells were treated with AsA (15  $\mu$ M) for 0, 0.5, 1, 2 and 4 h.
